# Supplementary material
Source: publisher figshare collection journal article supplement (https://acs.figshare.com/ndownloader/files/4378090)
Supplement: Supplementary file 1 [file 4378090]

## Supporting Information

### DNA Cleavage System of Nanosized Graphene Oxide Sheets and Copper Ions

Hongliu Ren, Chong Wang, Jiali Zhang, Xuejiao Zhou, Dafeng Xu, Jing Zheng,  
Shouwu Guo,\* and Jingyan Zhang\*

#### Physical methods:

Electronic absorption spectra of GO and DNA were recorded on a Cary 50 spectrophotometer (Varian, USA). IR spectra of GO was recorded on a Perkin-Nicolet FT-IR 200 in the range of 4000-400  $\text{cm}^{-1}$ . Samples were run as KBr pellets. Atomic Force Microscopic images of graphene oxide were taken on a Nanoscope MultiMode V scanning probe microscopy (SPM) system (Veeco, USA). The scanning rate was set usually at 0.7-1 Hz. The samples for AFM were prepared by dropping aqueous suspension ( $\sim 0.02 \text{ mg mL}^{-1}$ ) of the graphene oxide on freshly cleaved mica surface and dried under vacuum at 80  $^{\circ}\text{C}$ . A JASCO J815 spectropolarimeter (Jasco International Co. Ltd., Japan) equipped with a Jasco temperature controller (model PTC-423S) and controlled by a PC was used for all circular dichroism measurements at 22  $^{\circ}\text{C}$ . A 1 mL quartz cell of 1 cm path length was used. Each spectrum was averaged from five successive accumulations at a scan rate of 50 nm/min. Fluorescence measurements were carried out with Hitachi f4600. Agarose gel electrophoresis was carried out with DYY-6C electrophoresis apparatus (Liuyi Instrumental Co., China). The agarose gels were visualized and digitized with FR-200A Gel Image Analysis System and analyzed by SmartView software.

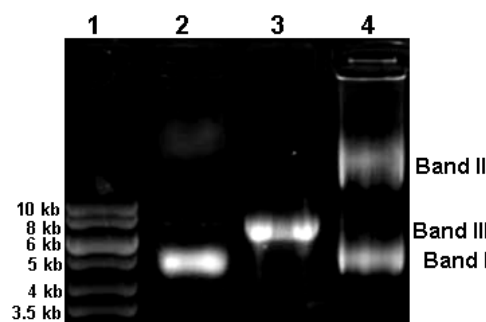

**Figure S1.** Agarose gel electrophoresis of the DNA ladder (lane 1), the DNA (0.75 µg/ml, lane 2), the DNA linearized by EcoRI (lane 3), and the DNA cleaved with GO/Cu<sup>2+</sup> (GO, 75µg/ml and Cu<sup>2+</sup>, 10 mM).

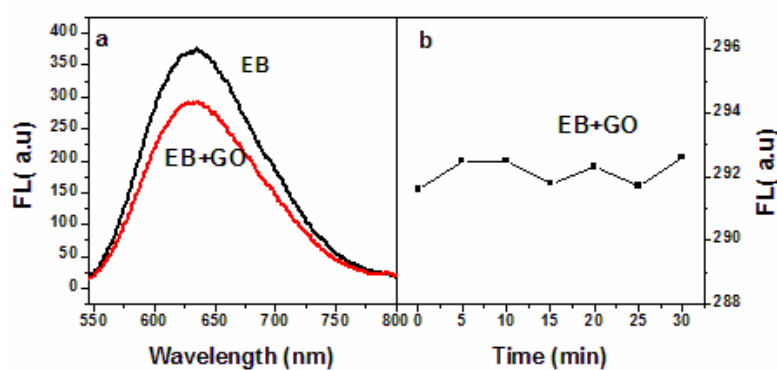

**Figure S2.** a) Effect of the GO on the FL intensity of EB alone (GO 10 µg/ml, EB 12 µg/ml), b) FL intensity variation of the EB with GO as function of time.

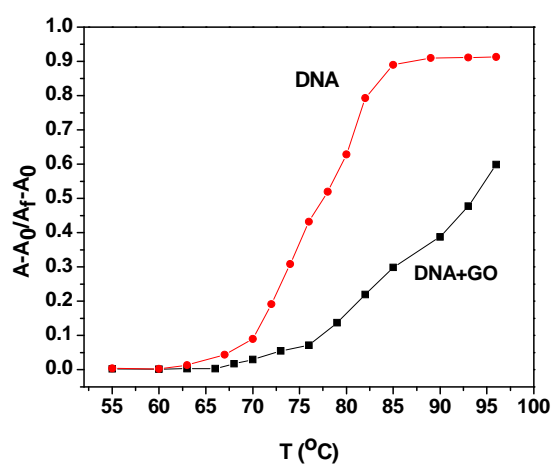

**Figure S3.** Thermal denaturation plots of DNA (10 µg/mL) at 260 nm in the absence and presence of the GO 3 µg/mL. Where  $A_0$ ,  $A_f$ , and  $A$  are the absorption intensities at 50 °C, 97 °C, and at a given temperature between 50-97 °C, respectively.  $A_f$  for the sample of the DNA with GO was calculated as  $A_f(\text{DNA}) + (A_0(\text{GO}) - A_0(\text{DNA}))$ .

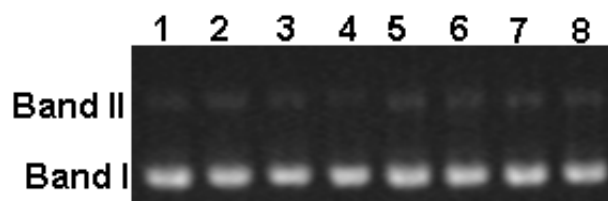

**Figure S4.** Agarose gel electrophoresis of the DNA (0.75  $\mu$ g) treated with different amount of  $\text{Cu}^{2+}$ . Incubation time 2 hours (37  $^{\circ}\text{C}$ ). **Lane 1** is control,  $\text{Cu}^{2+}$  concentrations were **2**: 2.5, **3**: 7.5, **4**: 10, **5**: 15, **6**: 20, **7**: 25, and **8**: 27.5 mM.

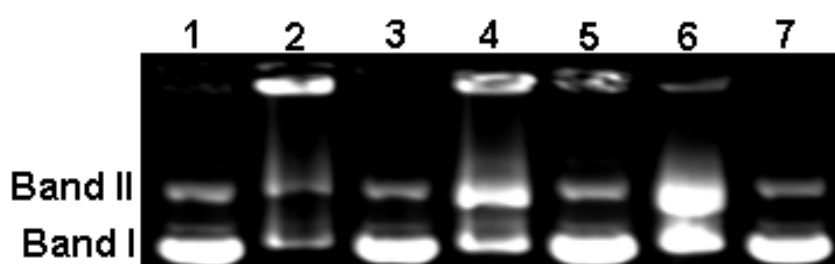

**Figure S5.** Comparison of the DNA cleavage activity of the  $\text{GO}/\text{Cu}^{2+}$  and  $\text{GO}$  alone in the buffer with the same ionic strength. DNA was 1.25  $\mu$ g, incubation time 2 h (37  $^{\circ}\text{C}$ ). **Lane 1** control, **Lanes 2, 4, and 6** were DNA with  $\text{GO}$  in the presence of 2.5, 10, and 22.5 mM  $\text{Cu}^{2+}$ , respectively. **Lanes 3, 5, and 7** are DNA with  $\text{GO}$  in the presence of 5, 20, and 45 mM  $\text{Na}^{+}$ , respectively.

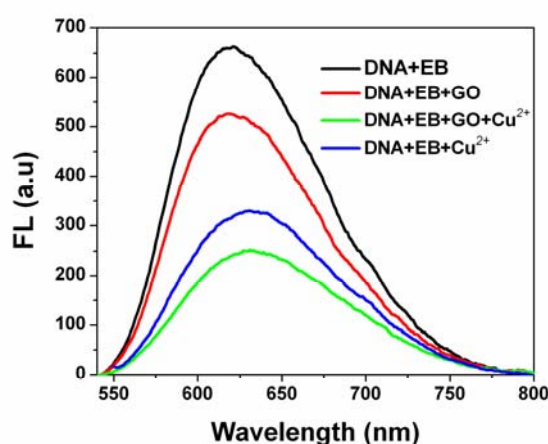

**Figure S6.** Effects of the  $\text{GO}$ ,  $\text{Cu}^{2+}$ , and  $\text{GO}/\text{Cu}^{2+}$  on the FL spectra of DNA with EB ( $\text{GO}$  10  $\mu\text{g}/\text{ml}$ , EB 12  $\mu\text{g}/\text{ml}$ , and  $\text{Cu}^{2+}$  1 mM).

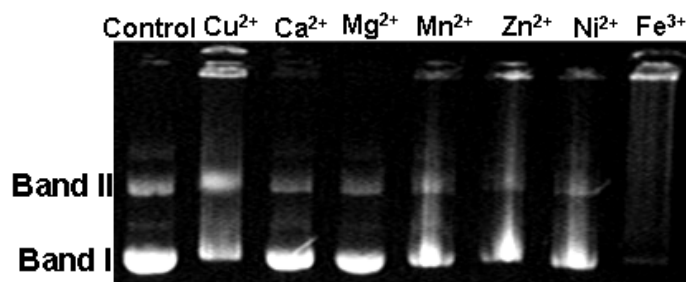

**Figure S7.** DNA cleavage activity of the GO with different metal ions incubated at 37 °C for 2 h. DNA was 1.2 µg, GO was 50 µg/mL, metal ions were all 10 mM except for Fe<sup>3+</sup> (1 mM).

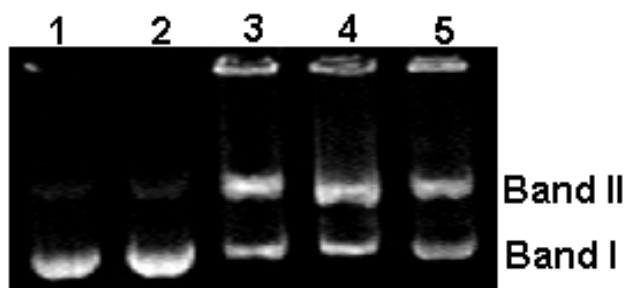

**Figure S8.** Agarose gel electrophoresis of the DNA (0.75 µg) treated with 125 µg/mL GO and 10 mM Cu<sup>2+</sup> in the presence of DMSO (5%) and BuOH (5%). Incubation time was 2 hours (37 °C ). **Lane 1** is control, **Lane 2**: DNA+GO, **Lane 3**: DNA+GO+Cu<sup>2+</sup>, **Lane 4**: DNA+GO+Cu<sup>2+</sup>+DMSO, and **Lane 5**: DNA+GO+Cu<sup>2+</sup>+BuOH.

**Table S1.** Cleavage of the DNA (1.25 µg) under constant Cu<sup>2+</sup> concentration.

| reagent<br>(Cu <sup>2+</sup> (10 mM)/GO µg/mL) | band I | band II | well |
|------------------------------------------------|--------|---------|------|
| 0                                              | 98     | 0       | 2    |
| 12.5                                           | 93     | 5       | 2    |
| 25                                             | 67     | 17      | 16   |
| 50                                             | 50     | 33      | 17   |
| 75                                             | 40     | 44      | 16   |
| 100                                            | 41     | 46      | 13   |
| 125                                            | 30     | 50      | 20   |
